# Supplementary material for: Tailored synthesis of CoOX thin films for catalytic application
Source: Royal Society of Chemistry journal article supplement (doi:10.1039/c5ra20013j), 2015-01-01
Supplement: c5ra20013j1.pdf [file c5ra20013j1.pdf]

## Electronic Supplementary Information (ESI)

### Tailored synthesis of CoO<sub>x</sub> thin films for catalytic application

Shi-Bin Fan,<sup>a,b</sup> Guan-Fu Pan,<sup>a,b</sup> Jing Liang<sup>a</sup> and Zhen-Yu Tian<sup>a,\*</sup>

<sup>a</sup> Institute of Engineering Thermophysics, Chinese Academy of Sciences, 11 Beisihuanxi Road, Beijing 100190, China.

<sup>b</sup> University of Chinese Academy of Sciences, Beijing 100049, China

\* Corresponding author. Tel: +86-010 82543184, Fax: +86-010 82543184; E-mail: [tianzhenyu@iet.cn](mailto:tianzhenyu@iet.cn).

**Table S1** Experimental conditions

|                            |                                                        |
|----------------------------|--------------------------------------------------------|
| Precursor                  | Co(acac) <sub>2</sub>                                  |
| Solvent                    | Ethanol                                                |
| Concentration              | 2.5 mM                                                 |
| Substrates                 | Planar glass, stainless steel, mesh of stainless steel |
| Frequency and opening time | 4 Hz, 1.2 ms                                           |
| Evaporation temperature    | 220 °C                                                 |
| Substrate temperature      | 350, 400 and 450 °C                                    |
| System pressure            | 3.0 kPa                                                |
| N <sub>2</sub>             | 0.25 SLM                                               |
| O <sub>2</sub>             | 0.75 SLM                                               |

Note: SLM refers to standard liter per minute.

With every sample mesh, the catalytic test was performed three times. As shown in Fig. S1, a good reproducibility was observed for all the prepared samples.

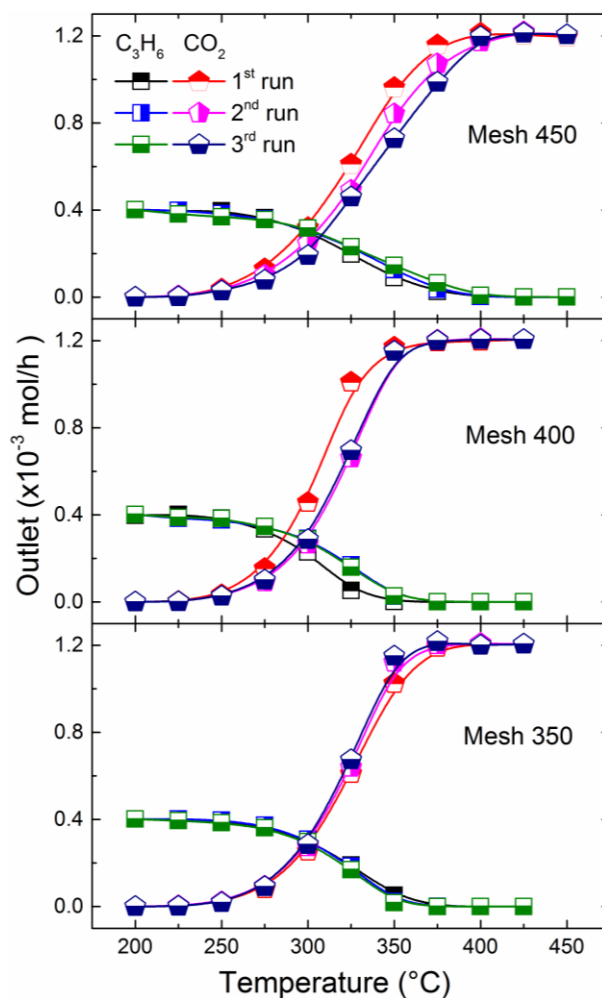

**Fig. S1** Repeated catalytic tests of C<sub>3</sub>H<sub>6</sub> with coated meshes prepared at 350, 400 and 450 °C.

Figure S2 presents the similar results obtained from the blank system and over NCM during the oxidation process of  $C_3H_6$ . The results indicate that NCM is an inert carrier and has negligible effects on the evaluation of the catalytic activity of the deposited TMOs.

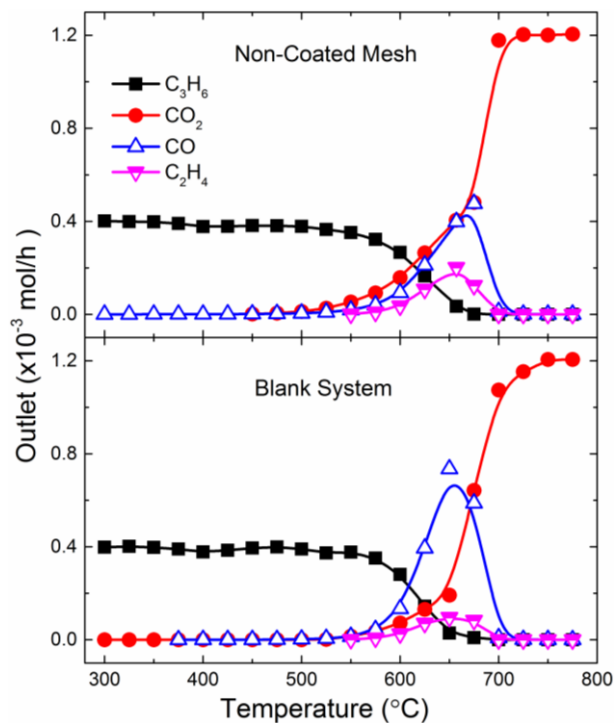

**Fig. S2** Outlet profiles of  $C_3H_6$  oxidation over NCM and in a blank system.

Figure S3 displays a standard IR spectrum for  $C_3H_6$  with a homemade gas chamber.  $575\text{ cm}^{-1}$ ,  $913\text{ cm}^{-1}$ ,  $990\text{ cm}^{-1}$ ,  $2953\text{ cm}^{-1}$  and  $3103\text{ cm}^{-1}$  are the characteristic absorption peaks of  $C_3H_6$ .

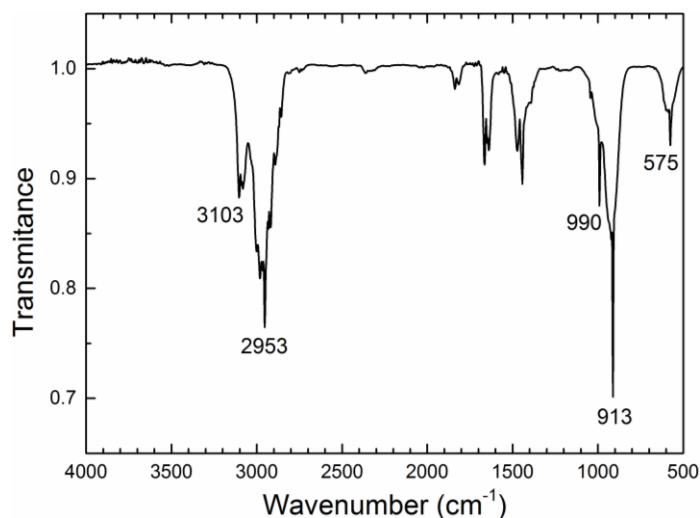

**Fig. S3** FTIR transmittance spectrum of  $C_3H_6$  obtained by a self-designed infrared gas pool.

The DRIFTS spectra of  $\text{CoO}_x$  prepared at 350 and 450 °C were showed in Fig. S4 and S5, respectively. As the temperature increases, the signal of propene ( $913\text{ cm}^{-1}$ ) gets weaker and the signal of  $\text{CO}_2$  becomes stronger. In Fig. S4 and S5, redshift of CoO and  $\text{Co}_3\text{O}_4$  peaks can be observed as temperature increased, this shows the increasing activity of the catalyst, moreover, the random changes of the relative intensity of peaks assigned to CoO and  $\text{Co}_3\text{O}_4$  consistent with a sustainable redox process.

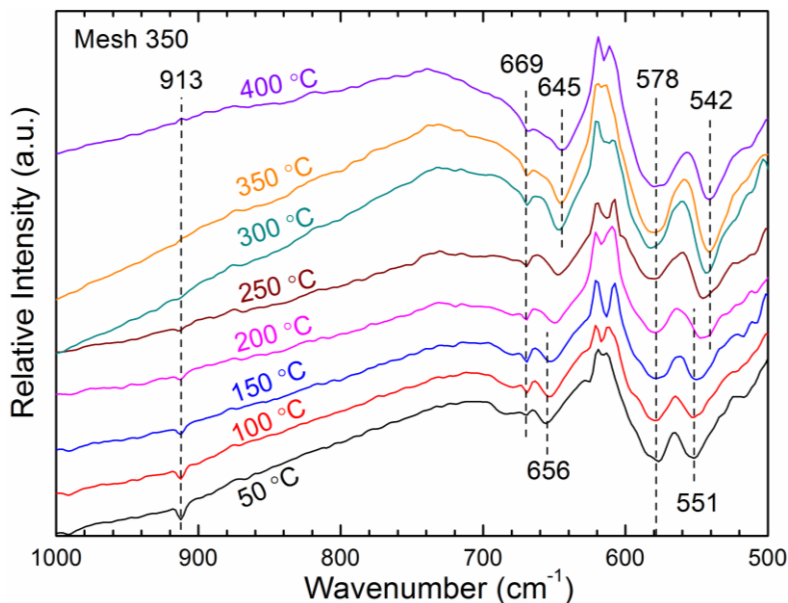

**Fig. S4** In situ DRIFTS spectra of CoO prepared at 350 °C during  $\text{C}_3\text{H}_6$  adsorption at different temperatures.

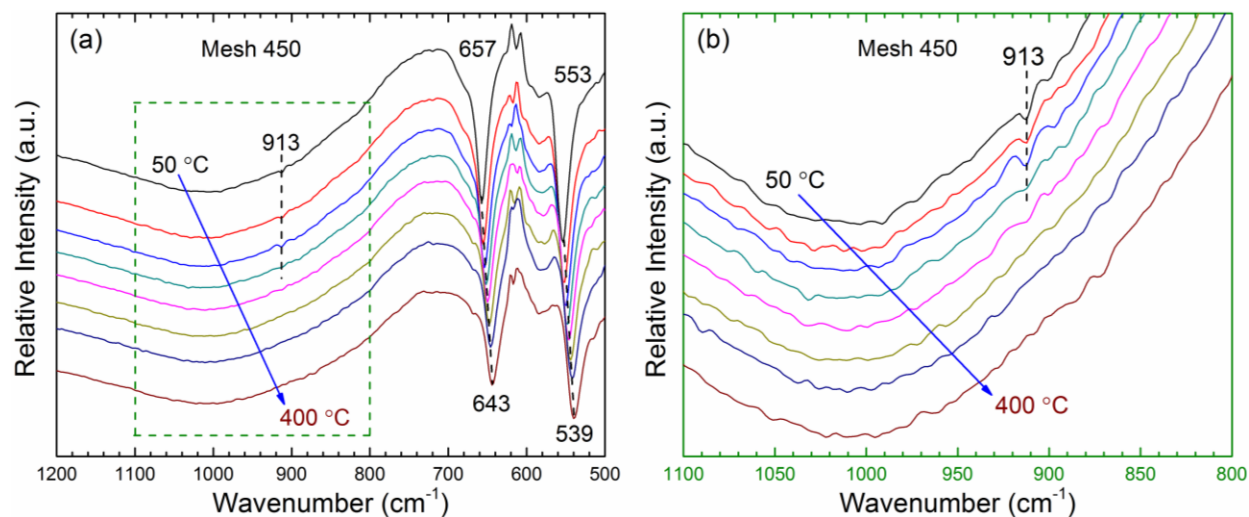

**Fig. S5** In situ DRIFTS spectra of  $\text{Co}_3\text{O}_4$  prepared at 450 °C during  $\text{C}_3\text{H}_6$  adsorption at different temperatures.
